# Supplementary material for: Self−Assembling Anchorage of Hyaluronic Acid on the Nanoparticle Surface Confers Superiority of Triple Negative Breast Cancer Treatment
Source: MDPI journal article supplement (doi:10.3390/pharmaceutics14112461), 2022-11-15
Supplement: s1 [file s1]

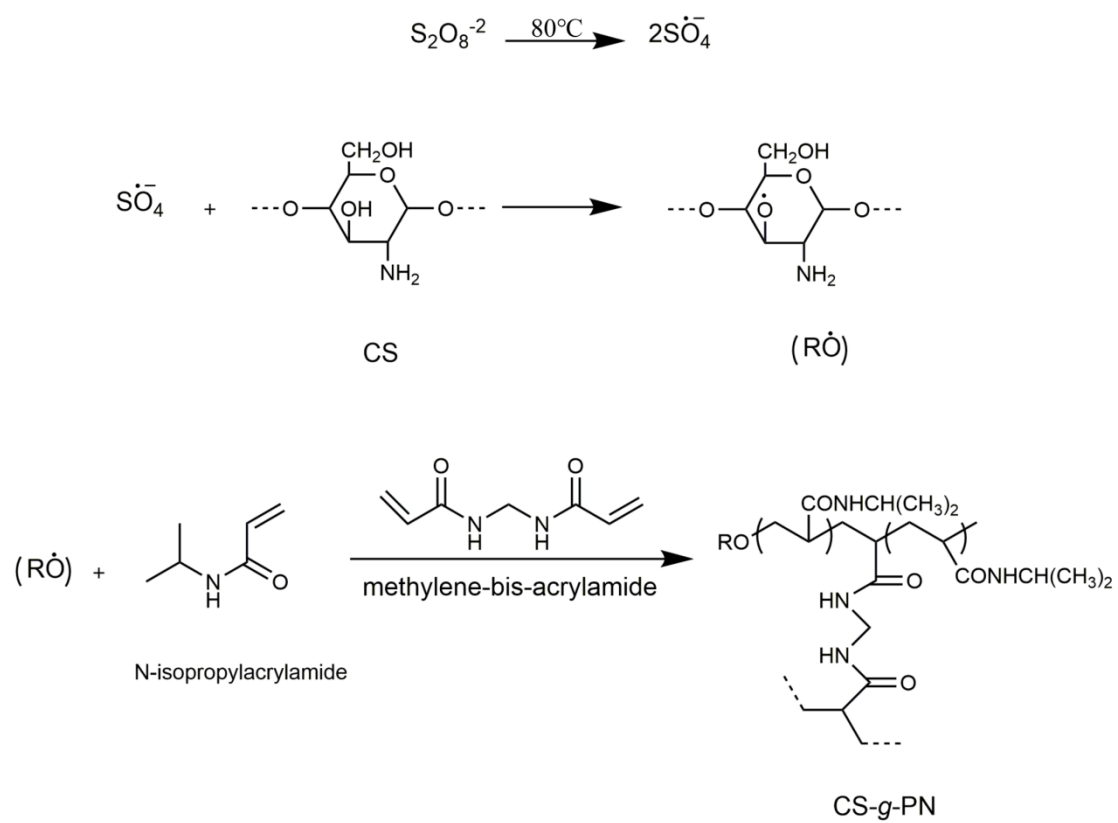

Figure S1. Schematic synthesis of CS-g-PN.

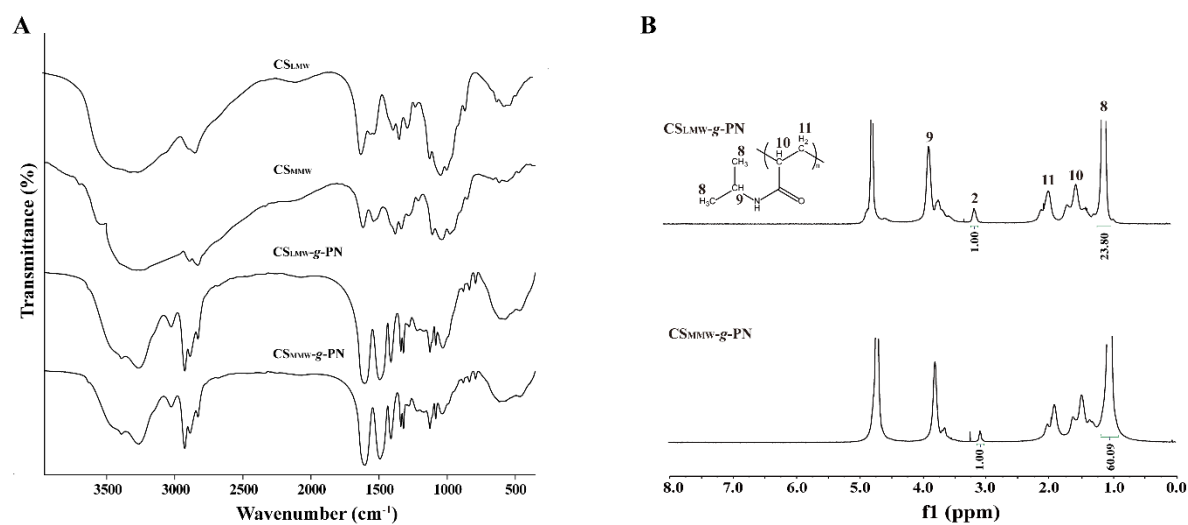

Figure S2. Characterization of CS-g-PN. (A) FT-IR spectrum of CS<sub>LMW</sub>, CS<sub>MMW</sub>, CS<sub>LMW</sub>-g-PN and CS<sub>MMW</sub>-g-PN. (B) <sup>1</sup>H-NMR spectrum of CS<sub>LMW</sub>-g-PN and CS<sub>MMW</sub>-g-PN.

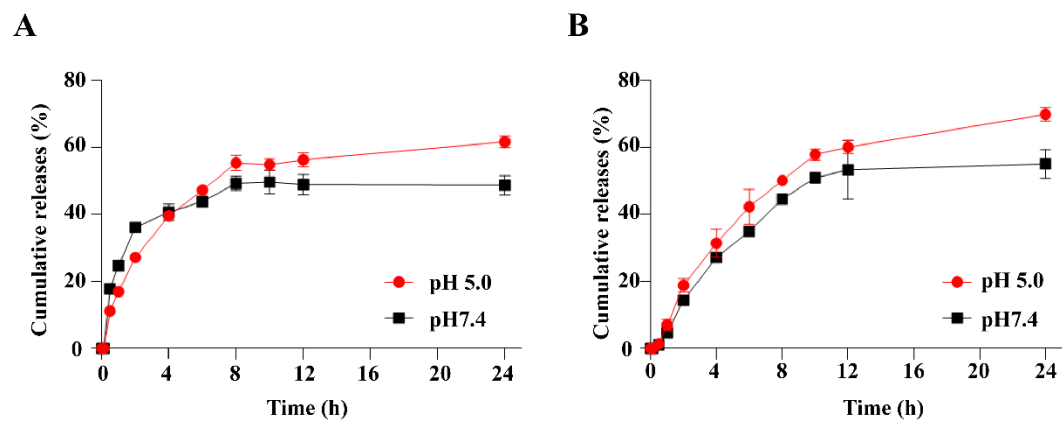

Figure S3. In vitro release profile of CUR@CS-NP. (A) CUR@CS<sub>LMW</sub>-NP (B) CUR@CS<sub>MMW</sub>-NP.

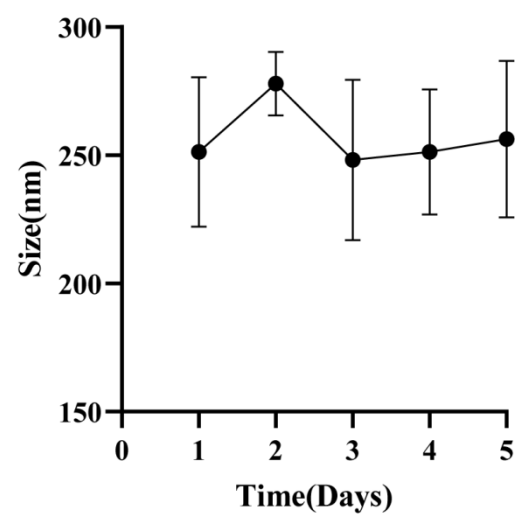

Figure S4. Colloidal stability of CUR@CS-NP@HA within 5days.

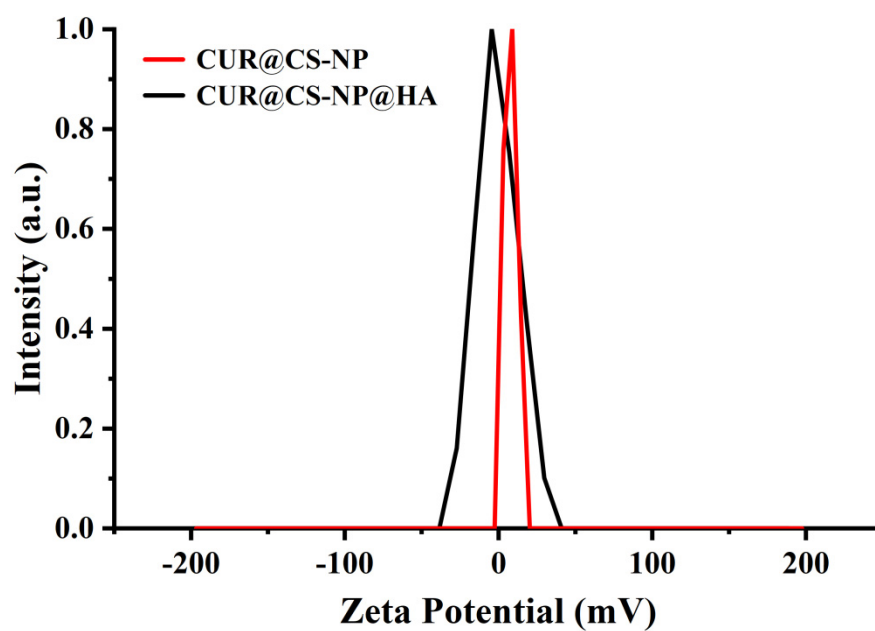

Figure S5. Zeta Potential distributions of CUR@CS-NP and CUR@CS-NP@HA.

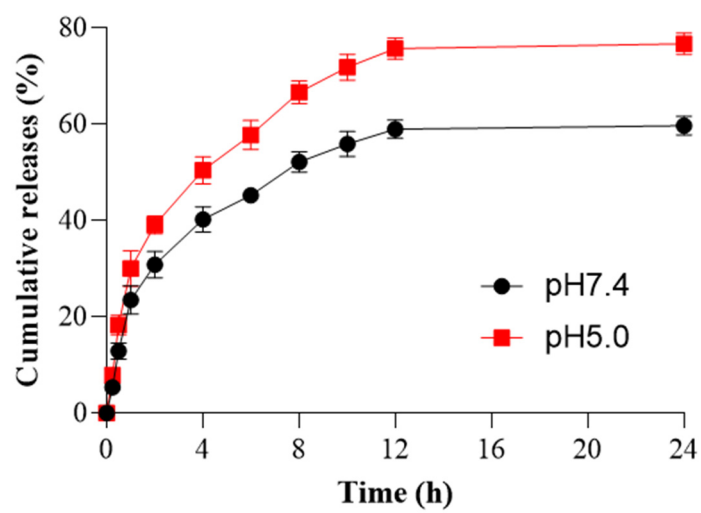

Figure S6. In vitro release profile of CUR@CS-NP@HA.

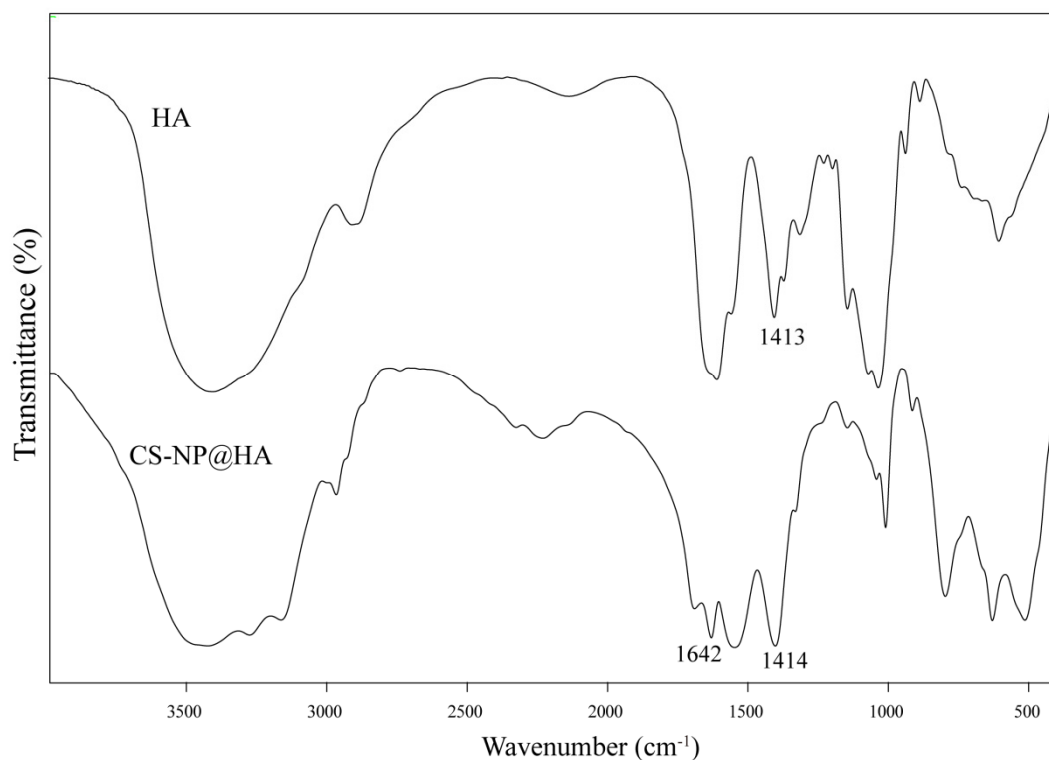

Figure S7. FT-IR spectra of HA and CS-NP@HA. Different from FT-IR spectrum of CS-g-PN, the amide bond absorption peak of CS at CS-NP@HA shifts to 1642  $\text{cm}^{-1}$ , and the C=O (-COOH) symmetric stretching vibration peak of HA shifts from 1413  $\text{cm}^{-1}$  to 1414  $\text{cm}^{-1}$ , all of which indicates HA interacting with CS-g-PN.

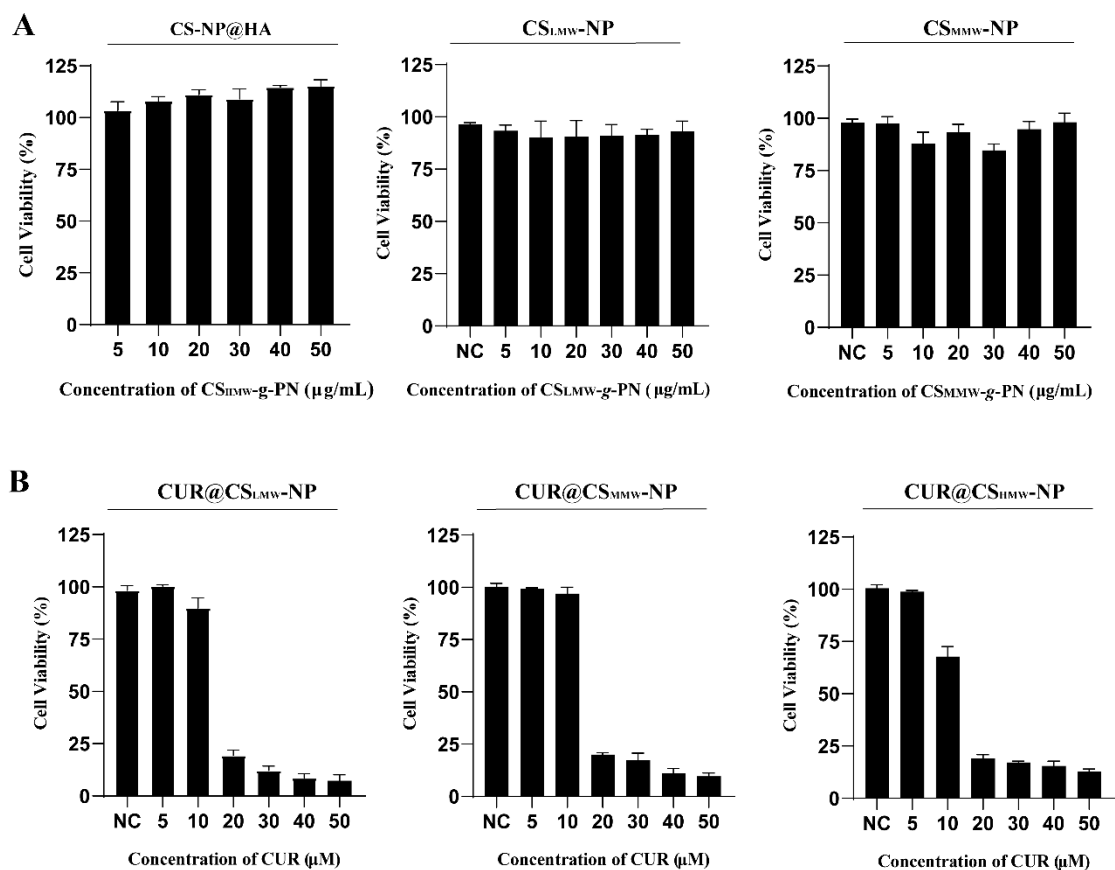

Figure S8. Cell cytotoxicity assay. (A) Cytotoxicity of blank NPs. (B) Cytotoxicity of CUR@CS<sub>LMW</sub>-NP, CUR@CS<sub>MMW</sub>-NP and CUR@CS<sub>HMW</sub>-NP.



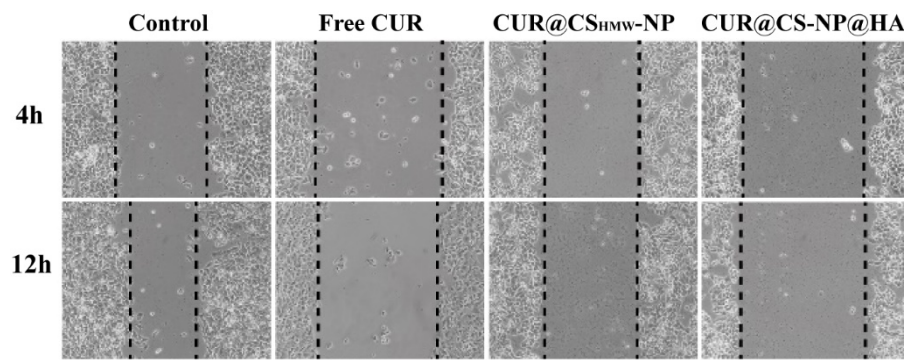

Figure S9. The migration of 4T1 cells treated with NPs in 4h and 12h.

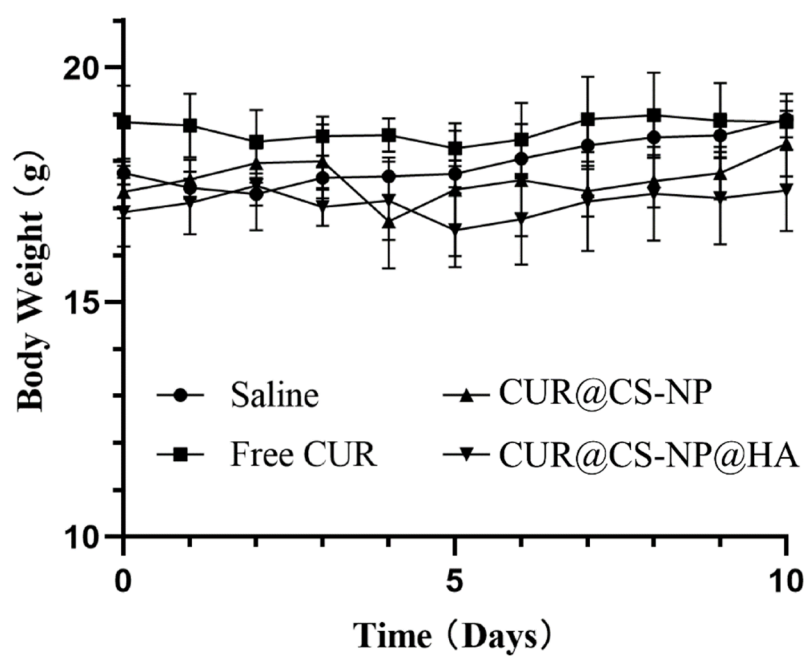

Figure S10. Body weight change in Balb/c mice over 10 days.

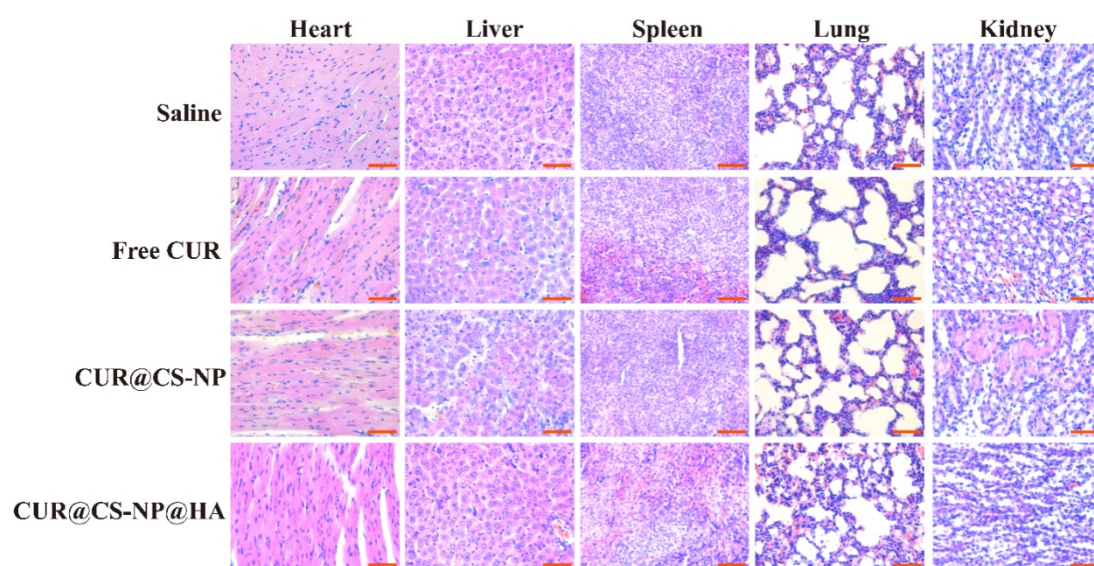

Figure S11. After 10 days of treatment, HE staining of heart, liver, spleen, lung and kidney tissues were taken from tumor-bearing Balb/c mice (scale bar=51μm).
